# Supplementary material
Source: publisher figshare collection journal article supplement (https://springernature.figshare.com/ndownloader/files/28130919)
Supplement: Supplementary file 1 [file 28130919]

datetime	id	value
1598929200	2	0.02
1598929200	3	0.037
1598929200	5	0.013
1598929200	6	0.001
1598929200	9	0.018
1598930100	2	0.02
1598930100	3	0.037
1598930100	5	0.018
1598930100	6	0.002
1598930100	9	0.043
1598931000	2	0.012
1598931000	3	0.036
1598931000	5	0.001
1598931000	6	0.001
1598931000	9	0.0
1598931900	2	0.016
1598931900	3	0.037
1598931900	5	0.014
1598931900	6	0.001
1598931900	9	0.026
1598932800	2	0.021
1598932800	3	0.037
1598932800	5	0.018
1598932800	6	0.001
1598932800	9	0.0
1598933700	2	0.008
1598933700	3	0.037
1598933700	5	0.001
1598933700	6	0.001
1598933700	9	0.007
1598934600	2	0.017
1598934600	3	0.038
1598934600	5	0.018
1598934600	6	0.001
1598934600	9	0.02
1598935500	2	0.019
1598935500	3	0.037
1598935500	5	0.017
1598935500	6	0.0
1598935500	9	0.021
1598936400	2	0.007
1598936400	3	0.037
1598936400	5	0.001
1598936400	6	0.0
1598936400	9	0.039
1598937300	2	0.019
1598937300	3	0.037
1598937300	5	0.02
1598937300	6	0.001
1598937300	9	0.0
1598938200	2	0.019
1598938200	3	0.036
1598938200	5	0.015
1598938200	6	0.0
1598938200	9	0.001
1598939100	2	0.006
1598939100	3	0.038
1598939100	5	0.001
1598939100	6	0.0
1598939100	9	0.031
1598940000	2	0.019
1598940000	3	0.037
1598940000	5	0.018
1598940000	6	0.0
1598940000	9	0.0
1598940900	2	0.015
1598940900	3	0.037
1598940900	5	0.017
1598940900	6	0.0
1598940900	9	0.0
1598941800	2	0.009
1598941800	3	0.037
1598941800	5	0.002
1598941800	6	0.0
1598941800	9	0.061
1598942700	2	0.019
1598942700	3	0.037
1598942700	5	0.012
1598942700	6	0.0
1598942700	9	0.0
1598943600	2	0.011
1598943600	3	0.038
1598943600	5	0.022
1598943600	6	0.0
1598943600	9	0.01
1598944500	2	0.014
1598944500	3	0.037
1598944500	5	0.001
1598944500	6	0.0
1598944500	9	0.016
1598945400	2	0.018
1598945400	3	0.038
1598945400	5	0.013
1598945400	6	0.0
1598945400	9	0.0
1598946300	2	0.007
1598946300	3	0.038
1598946300	5	0.021
1598946300	6	0.0
1598946300	9	0.024
1598947200	2	0.018
1598947200	3	0.037
1598947200	5	0.002
1598947200	6	0.0
1598947200	9	0.007
1598948100	2	0.019
1598948100	3	0.037
1598948100	5	0.012
1598948100	6	0.0
1598948100	9	0.029
1598949000	2	0.005
1598949000	3	0.037
1598949000	5	0.02
1598949000	6	0.0
1598949000	9	0.027
1598949900	2	0.019
1598949900	3	0.038
1598949900	5	0.002
1598949900	6	0.0
1598949900	9	0.0
1598950800	2	0.015
1598950800	3	0.037
1598950800	5	0.013
1598950800	6	0.0
1598950800	9	0.002
1598951700	2	0.009
1598951700	3	0.038
1598951700	5	0.018
1598951700	6	0.0
1598951700	9	0.024
1598952600	2	0.018
1598952600	3	0.037
1598952600	5	0.001
1598952600	6	0.0
1598952600	9	0.0
1598953500	2	0.01
1598953500	3	0.037
1598953500	5	0.014
1598953500	6	0.0
1598953500	9	0.025
1598954400	2	0.015
1598954400	3	0.036
1598954400	5	0.02
1598954400	6	0.002
1598954400	9	0.039
1598955300	2	0.019
1598955300	3	0.006
1598955300	5	0.002
1598955300	6	0.005
1598955300	9	0.0
1598956200	2	0.006
1598956200	3	0.0
1598956200	5	0.014
1598956200	6	0.006
1598956200	9	0.026
1598957100	2	0.018
1598957100	3	0.0
1598957100	5	0.012
1598957100	6	0.002
1598957100	9	0.0
1598958000	2	0.018
1598958000	3	0.0
1598958000	5	0.006
1598958000	6	0.0
1598958000	9	0.0
1598958900	2	0.135
1598958900	3	0.0
1598958900	5	0.012
1598958900	6	0.0
1598958900	9	0.027
1598959800	2	0.216
1598959800	3	0.0
1598959800	5	0.018
1598959800	6	0.0
1598959800	9	0.0
1598960700	2	0.253
1598960700	3	0.0
1598960700	5	0.004
1598960700	6	0.0
1598960700	9	0.031
1598961600	2	0.216
1598961600	3	0.0
1598961600	5	0.013
1598961600	6	0.0
1598961600	9	0.155
1598962500	2	0.203
1598962500	3	0.0
1598962500	5	0.012
1598962500	6	0.0
1598962500	9	0.452
1598963400	2	0.197
1598963400	3	0.0
1598963400	5	0.01
1598963400	6	0.0
1598963400	9	0.24
1598964300	2	0.182
1598964300	3	0.0
1598964300	5	0.013
1598964300	6	0.0
1598964300	9	0.025
1598965200	2	0.193
1598965200	3	0.0
1598965200	5	0.006
1598965200	6	0.0
1598965200	9	0.118
1598966100	2	0.194
1598966100	3	0.0
1598966100	5	0.037
1598966100	6	0.0
1598966100	9	0.038
1598967000	2	0.105
1598967000	3	0.0
1598967000	5	0.019
1598967000	6	0.0
1598967000	9	0.053
1598967900	2	0.016
1598967900	3	0.0
1598967900	5	0.009
1598967900	6	0.0
1598967900	9	0.013
1598968800	2	0.017
1598968800	3	0.0
1598968800	5	0.013
1598968800	6	0.0
1598968800	9	0.017
1598969700	2	0.043
1598969700	3	0.0
1598969700	5	0.015
1598969700	6	0.0
1598969700	9	0.078
1598970600	2	0.056
1598970600	3	0.0
1598970600	5	0.004
1598970600	6	0.0
1598970600	9	0.03
1598971500	2	0.074
1598971500	3	0.0
1598971500	5	0.019
1598971500	6	0.0
1598971500	9	0.026
1598972400	2	0.073
1598972400	3	0.0
1598972400	5	0.013
1598972400	6	0.0
1598972400	9	0.0
1598973300	2	0.039
1598973300	3	0.0
1598973300	5	0.031
1598973300	6	0.0
1598973300	9	0.028
1598974200	2	0.029
1598974200	3	0.0
1598974200	5	0.106
1598974200	6	0.0
1598974200	9	0.069
1598975100	2	0.032
1598975100	3	0.0
1598975100	5	0.055
1598975100	6	0.0
1598975100	9	0.242
1598976000	2	0.047
1598976000	3	0.0
1598976000	5	0.032
1598976000	6	0.001
1598976000	9	0.039
1598976900	2	0.043
1598976900	3	0.0
1598976900	5	0.031
1598976900	6	0.003
1598976900	9	0.013
1598977800	2	0.039
1598977800	3	0.0
1598977800	5	0.007
1598977800	6	0.002
1598977800	9	0.166
1598978700	2	0.05
1598978700	3	0.0
1598978700	5	0.014
1598978700	6	0.003
1598978700	9	0.107
1598979600	2	0.035
1598979600	3	0.0
1598979600	5	0.025
1598979600	6	0.002
1598979600	9	0.144
1598980500	2	0.061
1598980500	3	0.0
1598980500	5	0.003
1598980500	6	0.003
1598980500	9	0.028
1598981400	2	0.033
1598981400	3	0.0
1598981400	5	0.007
1598981400	6	0.002
1598981400	9	0.0
1598982300	2	0.058
1598982300	3	0.0
1598982300	5	0.032
1598982300	6	0.003
1598982300	9	0.01
1598983200	2	0.035
1598983200	3	0.0
1598983200	5	0.003
1598983200	6	0.002
1598983200	9	0.017
1598984100	2	0.052
1598984100	3	0.0
1598984100	5	0.005
1598984100	6	0.003
1598984100	9	0.094
1598985000	2	0.04
1598985000	3	0.0
1598985000	5	0.044
1598985000	6	0.003
1598985000	9	0.024
1598985900	2	0.046
1598985900	3	0.0
1598985900	5	0.003
1598985900	6	0.002
1598985900	9	0.038
1598986800	2	0.05
1598986800	3	0.0
1598986800	5	0.003
1598986800	6	0.003
1598986800	9	0.0
1598987700	2	0.036
1598987700	3	0.0
1598987700	5	0.035
1598987700	6	0.002
1598987700	9	0.027
1598988600	2	0.051
1598988600	3	0.0
1598988600	5	0.003
1598988600	6	0.003
1598988600	9	0.0
1598989500	2	0.042
1598989500	3	0.0
1598989500	5	0.003
1598989500	6	0.002
1598989500	9	0.0
1598990400	2	0.074
1598990400	3	0.0
1598990400	5	0.661
1598990400	6	0.003
1598990400	9	0.027
1598991300	2	0.256
1598991300	3	0.0
1598991300	5	0.623
1598991300	6	0.002
1598991300	9	0.0
1598992200	2	0.312
1598992200	3	0.0
1598992200	5	0.022
1598992200	6	0.003
1598992200	9	0.049
1598993100	2	0.33
1598993100	3	0.0
1598993100	5	0.062
1598993100	6	0.003
1598993100	9	0.013
1598994000	2	0.327
1598994000	3	0.0
1598994000	5	0.059
1598994000	6	0.005
1598994000	9	0.008
1598994900	2	0.316
1598994900	3	0.0
1598994900	5	0.019
1598994900	6	0.004
1598994900	9	0.175
1598995800	2	0.329
1598995800	3	0.025
1598995800	5	0.058
1598995800	6	0.005
1598995800	9	0.027
1598996700	2	0.288
1598996700	3	0.037
1598996700	5	0.039
1598996700	6	0.004
1598996700	9	0.029
1598997600	2	0.187
1598997600	3	0.037
1598997600	5	0.055
1598997600	6	0.005
1598997600	9	0.055
1598998500	2	0.258
1598998500	3	0.037
1598998500	5	0.092
1598998500	6	0.005
1598998500	9	0.062
1598999400	2	0.253
1598999400	3	0.036
1598999400	5	0.067
1598999400	6	0.004
1598999400	9	0.158
1599000300	2	0.256
1599000300	3	0.037
1599000300	5	0.064
1599000300	6	0.005
1599000300	9	0.006
1599001200	2	0.264
1599001200	3	0.036
1599001200	5	0.083
1599001200	6	0.011
1599001200	9	0.107
1599002100	2	0.251
1599002100	3	0.037
1599002100	5	0.103
1599002100	6	0.012
1599002100	9	0.033
1599003000	2	0.259
1599003000	3	0.036
1599003000	5	0.074
1599003000	6	0.003
1599003000	9	0.006
1599003900	2	0.262
1599003900	3	0.037
1599003900	5	0.079
1599003900	6	0.002
1599003900	9	0.029
1599004800	2	0.248
1599004800	3	0.036
1599004800	5	0.827
1599004800	6	0.006
1599004800	9	0.043
1599005700	2	0.264
1599005700	3	0.037
1599005700	5	0.024
1599005700	6	0.006
1599005700	9	0.006
1599006600	2	0.264
1599006600	3	0.037
1599006600	5	0.033
1599006600	6	0.003
1599006600	9	0.133
1599007500	2	0.251
1599007500	3	0.036
1599007500	5	0.05
1599007500	6	0.003
1599007500	9	0.007
1599008400	2	0.237
1599008400	3	0.036
1599008400	5	0.012
1599008400	6	0.003
1599008400	9	0.006
1599009300	2	0.028
1599009300	3	0.037
1599009300	5	0.034
1599009300	6	0.004
1599009300	9	0.033
1599010200	2	0.018
1599010200	3	0.036
1599010200	5	0.016
1599010200	6	0.001
1599010200	9	0.029
1599011100	2	0.03
1599011100	3	0.037
1599011100	5	0.004
1599011100	6	0.002
1599011100	9	0.016
1599012000	2	0.024
1599012000	3	0.036
1599012000	5	0.036
1599012000	6	0.002
1599012000	9	0.034
1599012900	2	0.022
1599012900	3	0.037
1599012900	5	0.002
1599012900	6	0.002
1599012900	9	0.006
1599013800	2	0.03
1599013800	3	0.037
1599013800	5	0.003
1599013800	6	0.001
1599013800	9	0.011
1599014700	2	0.021
1599014700	3	0.036
1599014700	5	0.031
1599014700	6	0.002
1599014700	9	0.028
1599015600	2	0.025
1599015600	3	0.037
1599015600	5	0.002
1599015600	6	0.002
1599015600	9	0.006
1599016500	2	0.029
1599016500	3	0.037
1599016500	5	0.008
1599016500	6	0.001
1599016500	9	0.054
1599017400	2	0.007
1599017400	3	0.037
1599017400	5	0.026
1599017400	6	0.001
1599017400	9	0.014
1599018300	2	0.018
1599018300	3	0.037
1599018300	5	0.002
1599018300	6	0.001
1599018300	9	0.0
1599019200	2	0.018
1599019200	3	0.037
1599019200	5	0.017
1599019200	6	0.001
1599019200	9	0.152
1599020100	2	0.004
1599020100	3	0.038
1599020100	5	0.021
1599020100	6	0.001
1599020100	9	0.005
1599021000	2	0.019
1599021000	3	0.038
1599021000	5	0.002
1599021000	6	0.003
1599021000	9	0.0
1599021900	2	0.015
1599021900	3	0.037
1599021900	5	0.011
1599021900	6	0.001
1599021900	9	0.028
1599022800	2	0.007
1599022800	3	0.037
1599022800	5	0.025
1599022800	6	0.002
1599022800	9	0.033
1599023700	2	0.019
1599023700	3	0.038
1599023700	5	0.001
1599023700	6	0.001
1599023700	9	0.0
1599024600	2	0.011
1599024600	3	0.037
1599024600	5	0.006
1599024600	6	0.002
1599024600	9	0.028
1599025500	2	0.011
1599025500	3	0.037
1599025500	5	0.03
1599025500	6	0.001
1599025500	9	0.0
1599026400	2	0.018
1599026400	3	0.038
1599026400	5	0.001
1599026400	6	0.002
1599026400	9	0.0
1599027300	2	0.007
1599027300	3	0.037
1599027300	5	0.002
1599027300	6	0.001
1599027300	9	0.027
1599028200	2	0.016
1599028200	3	0.038
1599028200	5	0.034
1599028200	6	0.001
1599028200	9	0.021
1599029100	2	0.017
1599029100	3	0.037
1599029100	5	0.001
1599029100	6	0.001
1599029100	9	0.023
1599030000	2	0.004
1599030000	3	0.038
1599030000	5	0.002
1599030000	6	0.001
1599030000	9	0.017
1599030900	2	0.018
1599030900	3	0.037
1599030900	5	0.034
1599030900	6	0.0
1599030900	9	0.0
1599031800	2	0.015
1599031800	3	0.038
1599031800	5	0.001
1599031800	6	0.001
1599031800	9	0.022
1599032700	2	0.007
1599032700	3	0.038
1599032700	5	0.003
1599032700	6	0.0
1599032700	9	0.006
1599033600	2	0.018
1599033600	3	0.037
1599033600	5	0.028
1599033600	6	0.0
1599033600	9	0.0
1599034500	2	0.009
1599034500	3	0.038
1599034500	5	0.006
1599034500	6	0.0
1599034500	9	0.061
1599035400	2	0.013
1599035400	3	0.037
1599035400	5	0.004
1599035400	6	0.0
1599035400	9	0.0
1599036300	2	0.017
1599036300	3	0.038
1599036300	5	0.02
1599036300	6	0.0
1599036300	9	0.122
1599037200	2	0.004
1599037200	3	0.037
1599037200	5	0.012
1599037200	6	0.0
1599037200	9	0.044
1599038100	2	0.018
1599038100	3	0.037
1599038100	5	0.008
1599038100	6	0.0
1599038100	9	0.0
1599039000	2	0.016
1599039000	3	0.038
1599039000	5	0.009
1599039000	6	0.0
1599039000	9	0.0
1599039900	2	0.148
1599039900	3	0.037
1599039900	5	0.02
1599039900	6	0.0
1599039900	9	0.043
1599040800	2	0.205
1599040800	3	0.037
1599040800	5	0.009
1599040800	6	0.0
1599040800	9	0.019
1599041700	2	0.193
1599041700	3	0.037
1599041700	5	0.007
1599041700	6	0.001
1599041700	9	0.003
1599042600	2	0.197
1599042600	3	0.012
1599042600	5	0.018
1599042600	6	0.0
1599042600	9	0.024
1599043500	2	0.201
1599043500	3	0.0
1599043500	5	0.009
1599043500	6	0.0
1599043500	9	0.0
1599044400	2	0.184
1599044400	3	0.0
1599044400	5	0.006
1599044400	6	0.002
1599044400	9	0.013
1599045300	2	0.196
1599045300	3	0.0
1599045300	5	0.018
1599045300	6	0.007
1599045300	9	0.015
1599046200	2	0.134
1599046200	3	0.0
1599046200	5	0.01
1599046200	6	0.004
1599046200	9	0.03
1599047100	2	0.056
1599047100	3	0.0
1599047100	5	0.01
1599047100	6	0.005
1599047100	9	0.025
1599048000	2	0.026
1599048000	3	0.0
1599048000	5	0.018
1599048000	6	0.005
1599048000	9	0.008
1599048900	2	0.038
1599048900	3	0.0
1599048900	5	0.023
1599048900	6	0.005
1599048900	9	0.101
1599049800	2	0.029
1599049800	3	0.0
1599049800	5	0.025
1599049800	6	0.007
1599049800	9	0.478
1599050700	2	0.033
1599050700	3	0.0
1599050700	5	0.011
1599050700	6	0.005
1599050700	9	0.255
1599051600	2	0.037
1599051600	3	0.0
1599051600	5	0.011
1599051600	6	0.004
1599051600	9	0.026
1599052500	2	0.02
1599052500	3	0.0
1599052500	5	0.021
1599052500	6	0.003
1599052500	9	0.132
1599053400	2	0.021
1599053400	3	0.0
1599053400	5	0.002
1599053400	6	0.0
1599053400	9	0.001
1599054300	2	0.009
1599054300	3	0.0
1599054300	5	0.012
1599054300	6	0.0
1599054300	9	0.009
1599055200	2	0.014
1599055200	3	0.0
1599055200	5	0.025
1599055200	6	0.0
1599055200	9	0.041
1599056100	2	0.018
1599056100	3	0.0
1599056100	5	0.013
1599056100	6	0.0
1599056100	9	0.02
1599057000	2	0.009
1599057000	3	0.0
1599057000	5	0.032
1599057000	6	0.0
1599057000	9	0.035
1599057900	2	0.012
1599057900	3	0.0
1599057900	5	0.028
1599057900	6	0.001
1599057900	9	0.042
1599058800	2	0.018
1599058800	3	0.0
1599058800	5	0.029
1599058800	6	0.0
1599058800	9	0.04
1599059700	2	0.007
1599059700	3	0.0
1599059700	5	0.035
1599059700	6	0.0
1599059700	9	0.012
1599060600	2	0.02
1599060600	3	0.0
1599060600	5	0.024
1599060600	6	0.0
1599060600	9	0.035
1599061500	2	0.046
1599061500	3	0.0
1599061500	5	0.028
1599061500	6	0.0
1599061500	9	0.008
1599062400	2	0.032
1599062400	3	0.0
1599062400	5	0.035
1599062400	6	0.0
1599062400	9	0.019
1599063300	2	0.046
1599063300	3	0.0
1599063300	5	0.028
1599063300	6	0.0
1599063300	9	0.042
1599064200	2	0.045
1599064200	3	0.0
1599064200	5	0.013
1599064200	6	0.0
1599064200	9	0.017
1599065100	2	0.034
1599065100	3	0.0
1599065100	5	0.031
1599065100	6	0.001
1599065100	9	0.044
1599066000	2	0.049
1599066000	3	0.0
1599066000	5	0.03
1599066000	6	0.005
1599066000	9	0.017
1599066900	2	0.037
1599066900	3	0.0
1599066900	5	0.012
1599066900	6	0.003
1599066900	9	0.022
1599067800	2	0.042
1599067800	3	0.0
1599067800	5	0.041
1599067800	6	0.002
1599067800	9	0.066
1599068700	2	0.047
1599068700	3	0.0
1599068700	5	0.032
1599068700	6	0.001
1599068700	9	0.043
1599069600	2	0.032
1599069600	3	0.0
1599069600	5	0.044
1599069600	6	0.001
1599069600	9	0.06
1599070500	2	0.055
1599070500	3	0.0
1599070500	5	0.044
1599070500	6	0.001
1599070500	9	0.027
1599071400	2	0.041
1599071400	3	0.0
1599071400	5	0.013
1599071400	6	0.001
1599071400	9	0.037
1599072300	2	0.037
1599072300	3	0.0
1599072300	5	0.011
1599072300	6	0.0
1599072300	9	0.035
1599073200	2	0.046
1599073200	3	0.0
1599073200	5	0.013
1599073200	6	0.001
1599073200	9	0.063
1599074100	2	0.034
1599074100	3	0.0
1599074100	5	0.015
1599074100	6	0.001
1599074100	9	0.092
1599075000	2	0.043
1599075000	3	0.0
1599075000	5	0.017
1599075000	6	0.001
1599075000	9	0.049
1599075900	2	0.046
1599075900	3	0.0
1599075900	5	0.003
1599075900	6	0.003
1599075900	9	0.015
1599076800	2	0.043
1599076800	3	0.0
1599076800	5	0.021
1599076800	6	0.005
1599076800	9	0.014
1599077700	2	0.313
1599077700	3	0.0
1599077700	5	0.011
1599077700	6	0.005
1599077700	9	0.001
1599078600	2	0.335
1599078600	3	0.0
1599078600	5	0.011
1599078600	6	0.005
1599078600	9	0.029
1599079500	2	0.337
1599079500	3	0.0
1599079500	5	0.024
1599079500	6	0.006
1599079500	9	0.033
1599080400	2	0.349
1599080400	3	0.0
1599080400	5	0.054
1599080400	6	0.005
1599080400	9	0.014
1599081300	2	0.34
1599081300	3	0.001
1599081300	5	0.067
1599081300	6	0.006
1599081300	9	0.023
1599082200	2	0.349
1599082200	3	0.036
1599082200	5	0.063
1599082200	6	0.005
1599082200	9	0.006
1599083100	2	0.292
1599083100	3	0.038
1599083100	5	0.056
1599083100	6	0.003
1599083100	9	0.031
1599084000	2	0.226
1599084000	3	0.037
1599084000	5	0.067
1599084000	6	0.004
1599084000	9	0.008
1599084900	2	0.271
1599084900	3	0.038
1599084900	5	0.069
1599084900	6	0.003
1599084900	9	0.079
1599085800	2	0.281
1599085800	3	0.037
1599085800	5	0.067
1599085800	6	0.003
1599085800	9	0.003
1599086700	2	0.267
1599086700	3	0.037
1599086700	5	0.081
1599086700	6	0.003
1599086700	9	0.027
1599087600	2	0.28
1599087600	3	0.037
1599087600	5	0.41
1599087600	6	0.0
1599087600	9	0.002
1599088500	2	0.227
1599088500	3	0.037
1599088500	5	0.716
1599088500	6	0.0
1599088500	9	0.024
1599089400	2	0.214
1599089400	3	0.036
1599089400	5	0.088
1599089400	6	0.003
1599089400	9	0.012
1599090300	2	0.226
1599090300	3	0.037
1599090300	5	0.074
1599090300	6	0.002
1599090300	9	0.037
1599091200	2	0.165
1599091200	3	0.038
1599091200	5	0.103
1599091200	6	0.0
1599091200	9	0.039
1599092100	2	0.02
1599092100	3	0.037
1599092100	5	0.108
1599092100	6	0.001
1599092100	9	0.008
1599093000	2	0.029
1599093000	3	0.037
1599093000	5	0.1
1599093000	6	0.006
1599093000	9	0.014
1599093900	2	0.019
1599093900	3	0.037
1599093900	5	0.078
1599093900	6	0.003
1599093900	9	0.029
1599094800	2	0.026
1599094800	3	0.038
1599094800	5	0.075
1599094800	6	0.003
1599094800	9	0.008
1599095700	2	0.029
1599095700	3	0.037
1599095700	5	0.096
1599095700	6	0.003
1599095700	9	0.042
1599096600	2	0.015
1599096600	3	0.038
1599096600	5	0.515
1599096600	6	0.002
1599096600	9	0.034
1599097500	2	0.029
1599097500	3	0.038
1599097500	5	0.452
1599097500	6	0.002
1599097500	9	0.008
1599098400	2	0.026
1599098400	3	0.038
1599098400	5	0.045
1599098400	6	0.002
1599098400	9	0.035
1599099300	2	0.019
1599099300	3	0.038
1599099300	5	0.091
1599099300	6	0.001
1599099300	9	0.008
1599100200	2	0.029
1599100200	3	0.038
1599100200	5	0.058
1599100200	6	0.002
1599100200	9	0.008
1599101100	2	0.02
1599101100	3	0.038
1599101100	5	0.051
1599101100	6	0.001
1599101100	9	0.035
1599102000	2	0.026
1599102000	3	0.037
1599102000	5	0.06
1599102000	6	0.002
1599102000	9	0.041
1599102900	2	0.029
1599102900	3	0.037
1599102900	5	0.017
1599102900	6	0.001
1599102900	9	0.022
1599103800	2	0.006
1599103800	3	0.036
1599103800	5	0.026
1599103800	6	0.001
1599103800	9	0.021
1599104700	2	0.018
1599104700	3	0.037
1599104700	5	0.045
1599104700	6	0.002
1599104700	9	0.005
1599105600	2	0.014
1599105600	3	0.037
1599105600	5	0.022
1599105600	6	0.0
1599105600	9	0.027
1599106500	2	0.008
1599106500	3	0.037
1599106500	5	0.066
1599106500	6	0.0
1599106500	9	0.0
1599107400	2	0.018
1599107400	3	0.036
1599107400	5	0.041
1599107400	6	0.0
1599107400	9	0.026
1599108300	2	0.006
1599108300	3	0.036
1599108300	5	0.018
1599108300	6	0.0
1599108300	9	0.035
1599109200	2	0.016
1599109200	3	0.035
1599109200	5	0.026
1599109200	6	0.0
1599109200	9	0.0
1599110100	2	0.018
1599110100	3	0.036
1599110100	5	0.013
1599110100	6	0.0
1599110100	9	0.006
1599111000	2	0.005
1599111000	3	0.036
1599111000	5	0.023
1599111000	6	0.0
1599111000	9	0.021
1599111900	2	0.017
1599111900	3	0.035
1599111900	5	0.024
1599111900	6	0.0
1599111900	9	0.0
1599112800	2	0.01
1599112800	3	0.036
1599112800	5	0.016
1599112800	6	0.0
1599112800	9	0.027
1599113700	2	0.012
1599113700	3	0.036
1599113700	5	0.008
1599113700	6	0.0
1599113700	9	0.033
1599114600	2	0.017
1599114600	3	0.035
1599114600	5	0.017
1599114600	6	0.0
1599114600	9	0.0
1599115500	2	0.004
1599115500	3	0.037
1599115500	5	0.023
1599115500	6	0.0
1599115500	9	0.027
1599116400	2	0.018
1599116400	3	0.037
1599116400	5	0.001
1599116400	6	0.0
1599116400	9	0.0
1599117300	2	0.015
1599117300	3	0.036
1599117300	5	0.016
1599117300	6	0.0
1599117300	9	0.0
1599118200	2	0.007
1599118200	3	0.037
1599118200	5	0.022
1599118200	6	0.0
1599118200	9	0.028
1599119100	2	0.122
1599119100	3	0.037
1599119100	5	0.002
1599119100	6	0.0
1599119100	9	0.033
1599120000	2	0.194
1599120000	3	0.036
1599120000	5	0.013
1599120000	6	0.0
1599120000	9	0.0
1599120900	2	0.201
1599120900	3	0.037
1599120900	5	0.024
1599120900	6	0.0
1599120900	9	0.027
1599121800	2	0.202
1599121800	3	0.036
1599121800	5	0.002
1599121800	6	0.0
1599121800	9	0.0
1599122700	2	0.184
1599122700	3	0.036
1599122700	5	0.011
1599122700	6	0.0
1599122700	9	0.014
1599123600	2	0.198
1599123600	3	0.036
1599123600	5	0.027
1599123600	6	0.0
1599123600	9	0.013
1599124500	2	0.19
1599124500	3	0.036
1599124500	5	0.001
1599124500	6	0.0
1599124500	9	0.018
1599125400	2	0.189
1599125400	3	0.036
1599125400	5	0.008
1599125400	6	0.0
1599125400	9	0.035
1599126300	2	0.2
1599126300	3	0.036
1599126300	5	0.03
1599126300	6	0.0
1599126300	9	0.009
1599127200	2	0.123
1599127200	3	0.035
1599127200	5	0.001
1599127200	6	0.0
1599127200	9	0.0
1599128100	2	0.016
1599128100	3	0.008
1599128100	5	0.004
1599128100	6	0.0
1599128100	9	0.025
1599129000	2	0.015
1599129000	3	0.0
1599129000	5	0.034
1599129000	6	0.005
1599129000	9	0.002
1599129900	2	0.007
1599129900	3	0.0
1599129900	5	0.002
1599129900	6	0.005
1599129900	9	0.0
1599130800	2	0.017
1599130800	3	0.0
1599130800	5	0.001
1599130800	6	0.009
1599130800	9	0.061
1599131700	2	0.048
1599131700	3	0.0
1599131700	5	0.033
1599131700	6	0.005
1599131700	9	0.08
1599132600	2	0.02
1599132600	3	0.0
1599132600	5	0.001
1599132600	6	0.0
1599132600	9	0.384
1599133500	2	0.017
1599133500	3	0.0
1599133500	5	0.004
1599133500	6	0.0
1599133500	9	0.029
1599134400	2	0.004
1599134400	3	0.0
1599134400	5	0.041
1599134400	6	0.0
1599134400	9	0.002
1599135300	2	0.017
1599135300	3	0.0
1599135300	5	0.005
1599135300	6	0.0
1599135300	9	0.003
1599136200	2	0.01
1599136200	3	0.0
1599136200	5	0.024
1599136200	6	0.0
1599136200	9	0.039
1599137100	2	0.011
1599137100	3	0.0
1599137100	5	0.01
1599137100	6	0.0
1599137100	9	0.057
1599138000	2	0.017
1599138000	3	0.0
1599138000	5	0.009
1599138000	6	0.0
1599138000	9	0.062
1599138900	2	0.004
1599138900	3	0.0
1599138900	5	0.018
1599138900	6	0.0
1599138900	9	0.054
1599139800	2	0.016
1599139800	3	0.0
1599139800	5	0.008
1599139800	6	0.0
1599139800	9	0.023
1599140700	2	0.129
1599140700	3	0.0
1599140700	5	0.014
1599140700	6	0.0
1599140700	9	0.051
1599141600	2	0.185
1599141600	3	0.0
1599141600	5	0.022
1599141600	6	0.0
1599141600	9	0.047
1599142500	2	0.032
1599142500	3	0.0
1599142500	5	0.008
1599142500	6	0.0
1599142500	9	0.018
1599143400	2	0.025
1599143400	3	0.0
1599143400	5	0.017
1599143400	6	0.0
1599143400	9	0.047
1599144300	2	0.044
1599144300	3	0.0
1599144300	5	0.022
1599144300	6	0.0
1599144300	9	0.001
1599145200	2	0.044
1599145200	3	0.0
1599145200	5	0.02
1599145200	6	0.0
1599145200	9	0.001
1599146100	2	0.034
1599146100	3	0.0
1599146100	5	0.024
1599146100	6	0.0
1599146100	9	0.029
1599147000	2	0.047
1599147000	3	0.0
1599147000	5	0.066
1599147000	6	0.0
1599147000	9	0.001
1599147900	2	0.036
1599147900	3	0.0
1599147900	5	0.034
1599147900	6	0.0
1599147900	9	0.022
1599148800	2	0.042
1599148800	3	0.0
1599148800	5	0.009
1599148800	6	0.0
1599148800	9	0.067
1599149700	2	0.05
1599149700	3	0.0
1599149700	5	0.055
1599149700	6	0.0
1599149700	9	0.019
1599150600	2	0.066
1599150600	3	0.0
1599150600	5	0.022
1599150600	6	0.0
1599150600	9	0.043
1599151500	2	0.062
1599151500	3	0.0
1599151500	5	0.035
1599151500	6	0.0
1599151500	9	0.018
1599152400	2	0.049
1599152400	3	0.0
1599152400	5	0.056
1599152400	6	0.0
1599152400	9	0.015
1599153300	2	0.041
1599153300	3	0.0
1599153300	5	0.012
1599153300	6	0.0
1599153300	9	0.044
1599154200	2	0.035
1599154200	3	0.0
1599154200	5	0.014
1599154200	6	0.0
1599154200	9	0.037
1599155100	2	0.013
1599155100	3	0.0
1599155100	5	0.05
1599155100	6	0.0
1599155100	9	0.048
1599156000	2	0.018
1599156000	3	0.0
1599156000	5	0.012
1599156000	6	0.0
1599156000	9	0.025
1599156900	2	0.028
1599156900	3	0.0
1599156900	5	0.018
1599156900	6	0.0
1599156900	9	0.017
1599157800	2	0.041
1599157800	3	0.0
1599157800	5	0.044
1599157800	6	0.0
1599157800	9	0.044
1599158700	2	0.031
1599158700	3	0.0
1599158700	5	0.013
1599158700	6	0.0
1599158700	9	0.017
1599159600	2	0.021
1599159600	3	0.0
1599159600	5	0.02
1599159600	6	0.0
1599159600	9	0.03
1599160500	2	0.036
1599160500	3	0.0
1599160500	5	0.032
1599160500	6	0.0
1599160500	9	0.063
1599161400	2	0.013
1599161400	3	0.0
1599161400	5	0.004
1599161400	6	0.0
1599161400	9	0.016
1599162300	2	0.03
1599162300	3	0.0
1599162300	5	0.017
1599162300	6	0.0
1599162300	9	0.04
1599163200	2	0.018
1599163200	3	0.0
1599163200	5	0.02
1599163200	6	0.003
1599163200	9	0.019
1599164100	2	0.024
1599164100	3	0.0
1599164100	5	0.018
1599164100	6	0.023
1599164100	9	0.001
1599165000	2	0.1
1599165000	3	0.0
1599165000	5	0.031
1599165000	6	0.013
1599165000	9	0.042
1599165900	2	0.047
1599165900	3	0.0
1599165900	5	0.017
1599165900	6	0.011
1599165900	9	0.047
1599166800	2	0.041
1599166800	3	0.0
1599166800	5	0.017
1599166800	6	0.011
1599166800	9	0.026
1599167700	2	0.053
1599167700	3	0.0
1599167700	5	0.026
1599167700	6	0.01
1599167700	9	0.031
1599168600	2	0.048
1599168600	3	0.0
1599168600	5	0.027
1599168600	6	0.016
1599168600	9	0.015
1599169500	2	0.07
1599169500	3	0.036
1599169500	5	0.015
1599169500	6	0.0
1599169500	9	0.044
1599170400	2	0.162
1599170400	3	0.038
1599170400	5	0.042
1599170400	6	0.0
1599170400	9	0.018
1599171300	2	0.26
1599171300	3	0.038
1599171300	5	0.043
1599171300	6	0.0
1599171300	9	0.043
1599172200	2	0.261
1599172200	3	0.037
1599172200	5	0.048
1599172200	6	0.0
1599172200	9	0.148
1599173100	2	0.274
1599173100	3	0.038
1599173100	5	0.073
1599173100	6	0.0
1599173100	9	0.431
1599174000	2	0.276
1599174000	3	0.038
1599174000	5	0.076
1599174000	6	0.0
1599174000	9	0.111
1599174900	2	0.26
1599174900	3	0.037
1599174900	5	0.075
1599174900	6	0.0
1599174900	9	0.019
1599175800	2	0.223
1599175800	3	0.037
1599175800	5	0.387
1599175800	6	0.0
1599175800	9	0.006
1599176700	2	0.222
1599176700	3	0.038
1599176700	5	0.932
1599176700	6	0.0
1599176700	9	0.043
1599177600	2	0.206
1599177600	3	0.037
1599177600	5	0.093
1599177600	6	0.0
1599177600	9	0.029
1599178500	2	0.221
1599178500	3	0.038
1599178500	5	0.067
1599178500	6	0.0
1599178500	9	0.009
1599179400	2	0.227
1599179400	3	0.038
1599179400	5	0.094
1599179400	6	0.0
1599179400	9	0.03
1599180300	2	0.208
1599180300	3	0.038
1599180300	5	0.068
1599180300	6	0.0
1599180300	9	0.006
1599181200	2	0.221
1599181200	3	0.038
1599181200	5	0.079
1599181200	6	0.001
1599181200	9	0.028
1599182100	2	0.222
1599182100	3	0.038
1599182100	5	0.111
1599182100	6	0.004
1599182100	9	0.011
1599183000	2	0.177
1599183000	3	0.038
1599183000	5	1.042
1599183000	6	0.005
1599183000	9	0.04
1599183900	2	0.157
1599183900	3	0.038
1599183900	5	0.136
1599183900	6	0.0
1599183900	9	0.033
1599184800	2	0.031
1599184800	3	0.038
1599184800	5	0.057
1599184800	6	0.0
1599184800	9	0.006
1599185700	2	0.018
1599185700	3	0.037
1599185700	5	0.016
1599185700	6	0.0
1599185700	9	0.014
1599186600	2	0.029
1599186600	3	0.038
1599186600	5	0.035
1599186600	6	0.0
1599186600	9	0.025
1599187500	2	0.031
1599187500	3	0.038
1599187500	5	0.017
1599187500	6	0.0
1599187500	9	0.006
1599188400	2	0.018
1599188400	3	0.038
1599188400	5	0.028
1599188400	6	0.0
1599188400	9	0.055
1599189300	2	0.029
1599189300	3	0.038
1599189300	5	0.026
1599189300	6	0.0
1599189300	9	0.016
1599190200	2	0.03
1599190200	3	0.039
1599190200	5	0.003
1599190200	6	0.0
1599190200	9	0.006
1599191100	2	0.006
1599191100	3	0.038
1599191100	5	0.031
1599191100	6	0.0
1599191100	9	0.032
1599192000	2	0.019
1599192000	3	0.039
1599192000	5	0.01
1599192000	6	0.0
1599192000	9	0.0
1599192900	2	0.019
1599192900	3	0.038
1599192900	5	0.001
1599192900	6	0.0
1599192900	9	0.0
1599193800	2	0.005
1599193800	3	0.038
1599193800	5	0.024
1599193800	6	0.0
1599193800	9	0.034
1599194700	2	0.019
1599194700	3	0.039
1599194700	5	0.013
1599194700	6	0.0
1599194700	9	0.028
1599195600	2	0.019
1599195600	3	0.038
1599195600	5	0.002
1599195600	6	0.0
1599195600	9	0.013
1599196500	2	0.005
1599196500	3	0.039
1599196500	5	0.022
1599196500	6	0.0
1599196500	9	0.016
1599197400	2	0.019
1599197400	3	0.037
1599197400	5	0.019
1599197400	6	0.0
1599197400	9	0.0
1599198300	2	0.017
1599198300	3	0.038
1599198300	5	0.001
1599198300	6	0.0
1599198300	9	0.016
1599199200	2	0.007
1599199200	3	0.037
1599199200	5	0.019
1599199200	6	0.0
1599199200	9	0.011
1599200100	2	0.02
1599200100	3	0.037
1599200100	5	0.012
1599200100	6	0.0
1599200100	9	0.011
1599201000	2	0.014
1599201000	3	0.038
1599201000	5	0.011
1599201000	6	0.0
1599201000	9	0.046
1599201900	2	0.009
1599201900	3	0.038
1599201900	5	0.014
1599201900	6	0.0
1599201900	9	0.003
1599202800	2	0.018
1599202800	3	0.037
1599202800	5	0.007
1599202800	6	0.0
1599202800	9	0.024
1599203700	2	0.012
1599203700	3	0.038
1599203700	5	0.014
1599203700	6	0.0
1599203700	9	0.467
1599204600	2	0.011
1599204600	3	0.037
1599204600	5	0.019
1599204600	6	0.0
1599204600	9	0.086
1599205500	2	0.019
1599205500	3	0.037
1599205500	5	0.008
1599205500	6	0.0
1599205500	9	0.0
1599206400	2	0.008
1599206400	3	0.038
1599206400	5	0.002
1599206400	6	0.0
1599206400	9	0.058
1599207300	2	0.015
1599207300	3	0.037
1599207300	5	0.027
1599207300	6	0.0
1599207300	9	0.003
1599208200	2	0.018
1599208200	3	0.037
1599208200	5	0.013
1599208200	6	0.0
1599208200	9	0.0
1599209100	2	0.005
1599209100	3	0.037
1599209100	5	0.002
1599209100	6	0.0
1599209100	9	0.138
1599210000	2	0.017
1599210000	3	0.037
1599210000	5	0.01
1599210000	6	0.0
1599210000	9	0.0
1599210900	2	0.018
1599210900	3	0.038
1599210900	5	0.03
1599210900	6	0.0
1599210900	9	0.0
1599211800	2	0.004
1599211800	3	0.036
1599211800	5	0.001
1599211800	6	0.0
1599211800	9	0.028
1599212700	2	0.018
1599212700	3	0.037
1599212700	5	0.002
1599212700	6	0.0
1599212700	9	0.032
1599213600	2	0.015
1599213600	3	0.036
1599213600	5	0.033
1599213600	6	0.002
1599213600	9	0.001
1599214500	2	0.007
1599214500	3	0.004
1599214500	5	0.008
1599214500	6	0.009
1599214500	9	0.028
1599215400	2	0.195
1599215400	3	0.0
1599215400	5	0.001
1599215400	6	0.013
1599215400	9	0.0
1599216300	2	0.243
1599216300	3	0.0
1599216300	5	0.02
1599216300	6	0.012
1599216300	9	0.0
1599217200	2	0.199
1599217200	3	0.0
1599217200	5	0.015
1599217200	6	0.006
1599217200	9	0.028
1599218100	2	0.194
1599218100	3	0.0
1599218100	5	0.005
1599218100	6	0.003
1599218100	9	0.002
1599219000	2	0.179
1599219000	3	0.0
1599219000	5	0.015
1599219000	6	0.0
1599219000	9	0.157
1599219900	2	0.196
1599219900	3	0.0
1599219900	5	0.013
1599219900	6	0.0
1599219900	9	0.241
1599220800	2	0.193
1599220800	3	0.0
1599220800	5	0.017
1599220800	6	0.0
1599220800	9	0.468
1599221700	2	0.184
1599221700	3	0.0
1599221700	5	0.013
1599221700	6	0.0
1599221700	9	0.363
1599222600	2	0.193
1599222600	3	0.0
1599222600	5	0.025
1599222600	6	0.0
1599222600	9	0.072
1599223500	2	0.187
1599223500	3	0.0
1599223500	5	0.01
1599223500	6	0.0
1599223500	9	0.051
1599224400	2	0.159
1599224400	3	0.0
1599224400	5	0.023
1599224400	6	0.0
1599224400	9	0.027
1599225300	2	0.018
1599225300	3	0.0
1599225300	5	0.023
1599225300	6	0.0
1599225300	9	0.06
1599226200	2	0.005
1599226200	3	0.0
1599226200	5	0.002
1599226200	6	0.0
1599226200	9	0.08
1599227100	2	0.016
1599227100	3	0.0
1599227100	5	0.003
1599227100	6	0.0
1599227100	9	0.001
1599228000	2	0.017
1599228000	3	0.0
1599228000	5	0.036
1599228000	6	0.0
1599228000	9	0.028
1599228900	2	0.005
1599228900	3	0.0
1599228900	5	0.002
1599228900	6	0.0
1599228900	9	0.0
1599229800	2	0.017
1599229800	3	0.0
1599229800	5	0.006
1599229800	6	0.0
1599229800	9	0.001
1599230700	2	0.02
1599230700	3	0.0
1599230700	5	0.064
1599230700	6	0.0
1599230700	9	0.028
1599231600	2	0.122
1599231600	3	0.0
1599231600	5	0.008
1599231600	6	0.0
1599231600	9	0.021
1599232500	2	0.324
1599232500	3	0.0
1599232500	5	0.011
1599232500	6	0.0
1599232500	9	0.027
1599233400	2	0.185
1599233400	3	0.0
1599233400	5	0.046
1599233400	6	0.0
1599233400	9	0.014
1599234300	2	0.005
1599234300	3	0.0
1599234300	5	0.001
1599234300	6	0.0
1599234300	9	0.0
1599235200	2	0.016
1599235200	3	0.0
1599235200	5	0.014
1599235200	6	0.0
1599235200	9	0.028
1599236100	2	0.029
1599236100	3	0.0
1599236100	5	0.031
1599236100	6	0.0
1599236100	9	0.0
1599237000	2	0.039
1599237000	3	0.0
1599237000	5	0.01
1599237000	6	0.0
1599237000	9	0.0
1599237900	2	0.023
1599237900	3	0.0
1599237900	5	0.026
1599237900	6	0.0
1599237900	9	0.07
1599238800	2	0.042
1599238800	3	0.0
1599238800	5	0.022
1599238800	6	0.0
1599238800	9	0.009
1599239700	2	0.038
1599239700	3	0.0
1599239700	5	0.012
1599239700	6	0.0
1599239700	9	0.0
1599240600	2	0.017
1599240600	3	0.0
1599240600	5	0.038
1599240600	6	0.0
1599240600	9	0.027
1599241500	2	0.037
1599241500	3	0.0
1599241500	5	0.025
1599241500	6	0.0
1599241500	9	0.0
1599242400	2	0.019
1599242400	3	0.0
1599242400	5	0.015
1599242400	6	0.0
1599242400	9	0.021
1599243300	2	0.013
1599243300	3	0.0
1599243300	5	0.04
1599243300	6	0.0
1599243300	9	0.043
1599244200	2	0.021
1599244200	3	0.0
1599244200	5	0.022
1599244200	6	0.0
1599244200	9	0.0
1599245100	2	0.015
1599245100	3	0.0
1599245100	5	0.012
1599245100	6	0.0
1599245100	9	0.027
1599246000	2	0.024
1599246000	3	0.0
1599246000	5	0.044
1599246000	6	0.0
1599246000	9	0.0
1599246900	2	0.048
1599246900	3	0.0
1599246900	5	0.015
1599246900	6	0.0
1599246900	9	0.028
1599247800	2	0.045
1599247800	3	0.0
1599247800	5	0.01
1599247800	6	0.0
1599247800	9	0.0
1599248700	2	0.037
1599248700	3	0.0
1599248700	5	0.036
1599248700	6	0.0
1599248700	9	0.05
1599249600	2	0.035
1599249600	3	0.0
1599249600	5	0.007
1599249600	6	0.0
1599249600	9	0.012
1599250500	2	0.022
1599250500	3	0.0
1599250500	5	0.002
1599250500	6	0.0
1599250500	9	0.0
1599251400	2	0.012
1599251400	3	0.0
1599251400	5	0.034
1599251400	6	0.002
1599251400	9	0.027
1599252300	2	0.039
1599252300	3	0.0
1599252300	5	0.009
1599252300	6	0.0
1599252300	9	0.0
1599253200	2	0.049
1599253200	3	0.0
1599253200	5	0.002
1599253200	6	0.0
1599253200	9	0.027
1599254100	2	0.034
1599254100	3	0.0
1599254100	5	0.03
1599254100	6	0.001
1599254100	9	0.034
1599255000	2	0.047
1599255000	3	0.0
1599255000	5	0.014
1599255000	6	0.004
1599255000	9	0.021
1599255900	2	0.066
1599255900	3	0.026
1599255900	5	0.021
1599255900	6	0.005
1599255900	9	0.038
1599256800	2	0.02
1599256800	3	0.037
1599256800	5	0.05
1599256800	6	0.007
1599256800	9	0.023
1599257700	2	0.086
1599257700	3	0.038
1599257700	5	0.083
1599257700	6	0.031
1599257700	9	0.056
1599258600	2	0.215
1599258600	3	0.038
1599258600	5	0.062
1599258600	6	0.023
1599258600	9	0.037
1599259500	2	0.152
1599259500	3	0.037
1599259500	5	0.108
1599259500	6	0.023
1599259500	9	0.083
1599260400	2	0.15
1599260400	3	0.038
1599260400	5	0.093
1599260400	6	0.024
1599260400	9	0.03
1599261300	2	0.147
1599261300	3	0.038
1599261300	5	0.07
1599261300	6	0.023
1599261300	9	0.037
1599262200	2	0.14
1599262200	3	0.038
1599262200	5	0.097
1599262200	6	0.025
1599262200	9	0.047
1599263100	2	0.148
1599263100	3	0.038
1599263100	5	0.072
1599263100	6	0.046
1599263100	9	0.045
1599264000	2	0.157
1599264000	3	0.037
1599264000	5	0.071
1599264000	6	0.045
1599264000	9	0.023
1599264900	2	0.06
1599264900	3	0.038
1599264900	5	0.086
1599264900	6	0.039
1599264900	9	0.04
1599265800	2	0.022
1599265800	3	0.038
1599265800	5	0.076
1599265800	6	0.039
1599265800	9	0.027
1599266700	2	0.029
1599266700	3	0.039
1599266700	5	0.076
1599266700	6	0.04
1599266700	9	0.008
1599267600	2	0.023
1599267600	3	0.038
1599267600	5	0.074
1599267600	6	0.039
1599267600	9	0.034
1599268500	2	0.021
1599268500	3	0.038
1599268500	5	1.042
1599268500	6	0.04
1599268500	9	0.008
1599269400	2	0.029
1599269400	3	0.039
1599269400	5	0.668
1599269400	6	0.03
1599269400	9	0.02
1599270300	2	0.024
1599270300	3	0.038
1599270300	5	0.046
1599270300	6	0.02
1599270300	9	0.057
1599271200	2	0.021
1599271200	3	0.039
1599271200	5	0.034
1599271200	6	0.017
1599271200	9	0.008
1599272100	2	0.029
1599272100	3	0.038
1599272100	5	0.058
1599272100	6	0.012
1599272100	9	0.034
1599273000	2	0.024
1599273000	3	0.039
1599273000	5	0.018
1599273000	6	0.002
1599273000	9	0.008
1599273900	2	0.021
1599273900	3	0.039
1599273900	5	0.018
1599273900	6	0.002
1599273900	9	0.019
1599274800	2	0.029
1599274800	3	0.038
1599274800	5	0.061
1599274800	6	0.001
1599274800	9	0.024
1599275700	2	0.016
1599275700	3	0.039
1599275700	5	0.045
1599275700	6	0.002
1599275700	9	0.031
1599276600	2	0.01
1599276600	3	0.039
1599276600	5	0.03
1599276600	6	0.001
1599276600	9	0.032
1599277500	2	0.02
1599277500	3	0.039
1599277500	5	0.066
1599277500	6	0.001
1599277500	9	0.0
1599278400	2	0.014
1599278400	3	0.039
1599278400	5	0.03
1599278400	6	0.002
1599278400	9	0.003
1599279300	2	0.014
1599279300	3	0.039
1599279300	5	0.043
1599279300	6	0.001
1599279300	9	0.024
1599280200	2	0.213
1599280200	3	0.039
1599280200	5	0.04
1599280200	6	0.001
1599280200	9	0.0
1599281100	2	0.203
1599281100	3	0.039
1599281100	5	0.021
1599281100	6	0.001
1599281100	9	0.036
1599282000	2	0.204
1599282000	3	0.039
1599282000	5	0.001
1599282000	6	0.001
1599282000	9	0.025
1599282900	2	0.208
1599282900	3	0.039
1599282900	5	0.024
1599282900	6	0.001
1599282900	9	0.0
1599283800	2	0.196
1599283800	3	0.039
1599283800	5	0.017
1599283800	6	0.0
1599283800	9	0.027
1599284700	2	0.201
1599284700	3	0.038
1599284700	5	0.003
1599284700	6	0.0
1599284700	9	0.0
1599285600	2	0.205
1599285600	3	0.039
1599285600	5	0.023
1599285600	6	0.0
1599285600	9	0.002
1599286500	2	0.194
1599286500	3	0.039
1599286500	5	0.005
1599286500	6	0.001
1599286500	9	0.024
1599287400	2	0.134
1599287400	3	0.039
1599287400	5	0.016
1599287400	6	0.0
1599287400	9	0.033
1599288300	2	0.019
1599288300	3	0.039
1599288300	5	0.016
1599288300	6	0.0
[truncated: 8,000 more rows]
